# Supplementary material
Source: Springer Nature journal article supplement (https://www.springermedizin.de/resource/supplementary/12891_2010_1059_MOESM1_ESM.pdf/9507510)

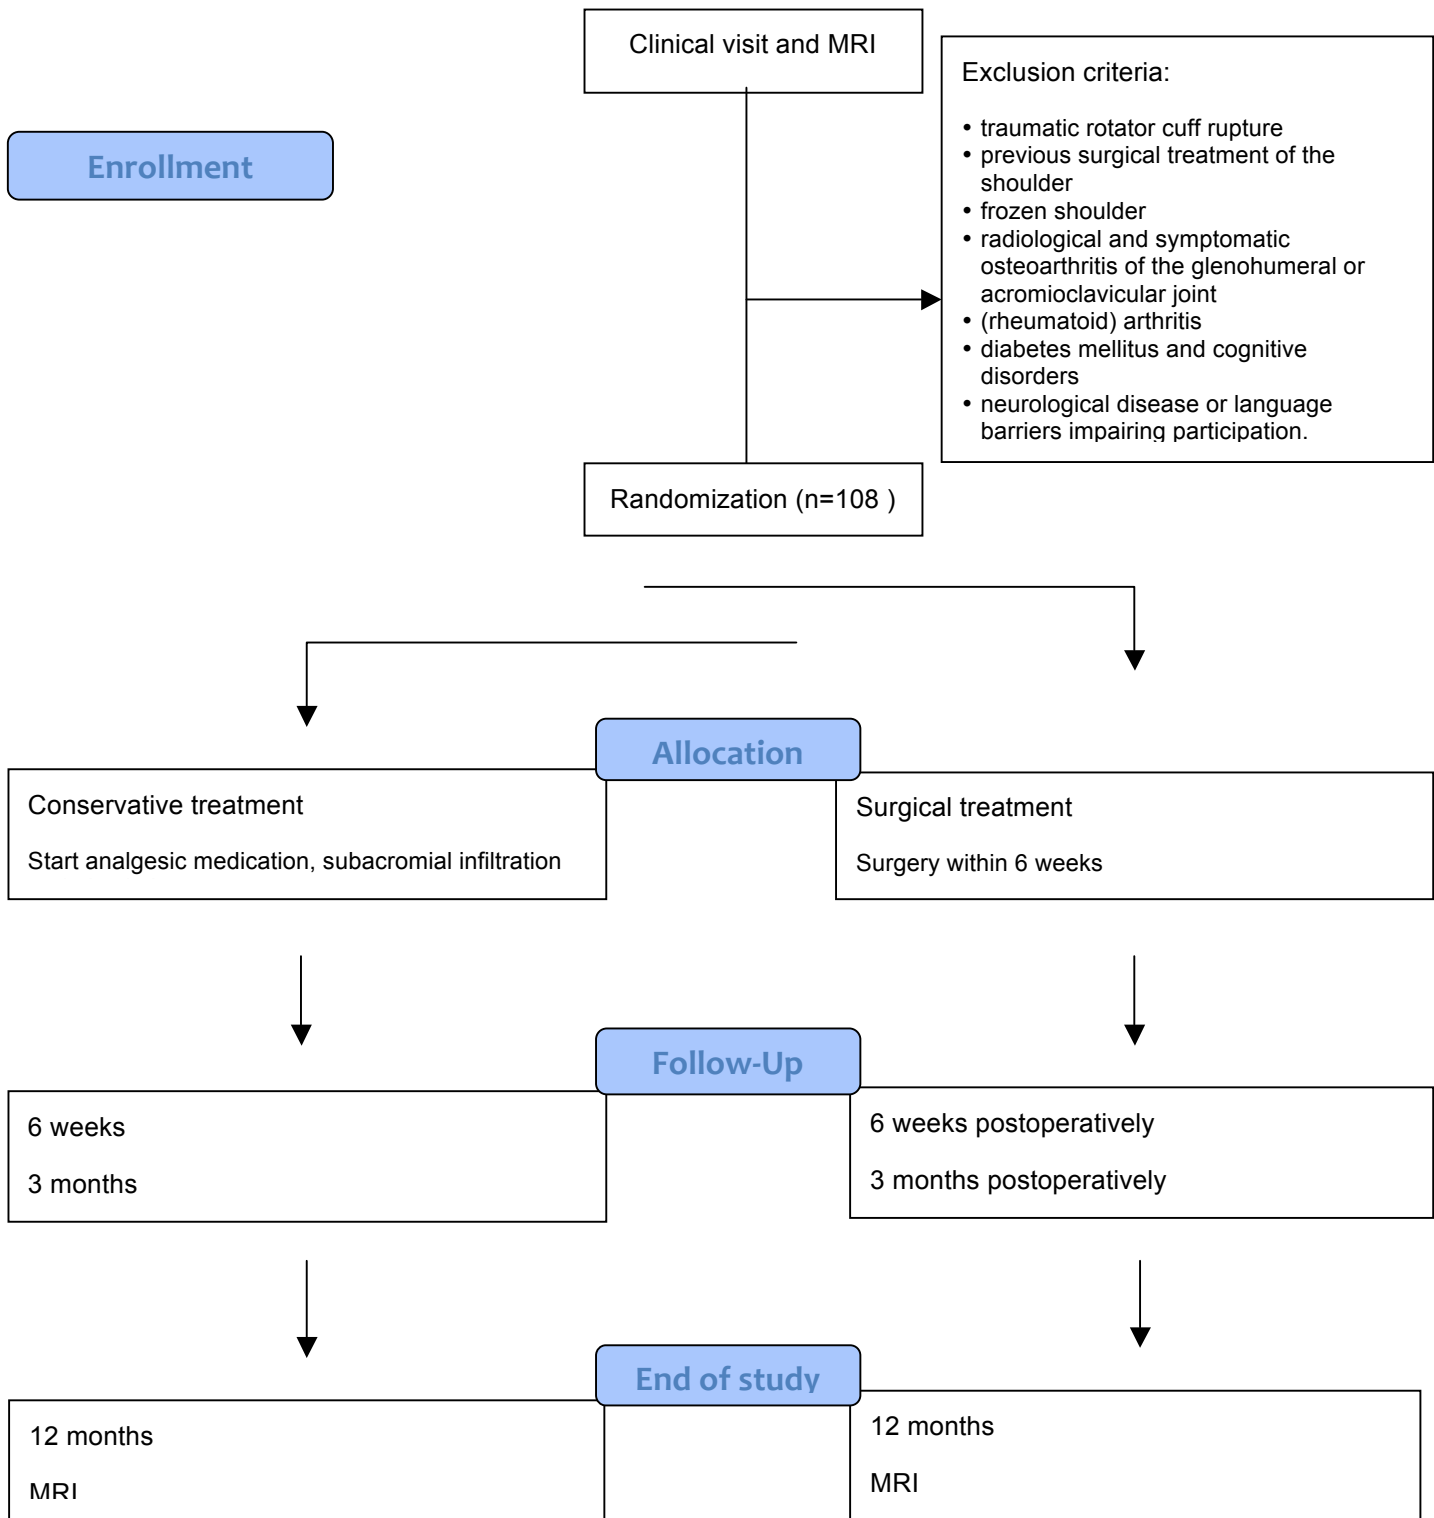

Supplement: MOESM1 [file 9507510]
